# Supplementary material for: Designing a Syndromic Bovine Mortality Surveillance System: Lessons Learned From the 1-Year Test of the French OMAR Alert Tool
Source: Front Vet Sci. 2020 Jan 9;6:453. doi: 10.3389/fvets.2019.00453 (PMC6962143; doi:10.3389/fvets.2019.00453)
Supplement: Supplementary Material S4 — Detailed report. [file Table_4.XLSX]

## Sheet: Alarm w
ID		Demographic information				Week w mortality information						Low severity indicators (average of 26 to 50 occurrences per year)			Medium severity indicators (averge of 5 to 25 occurrences per year)						High severity indicators (average of 1 to 4 occurrences per year)										Number of algorithms with score >0 week w and three previous weeks (w-1/w-2/w-3)		Excess ratio (number of excess deaths) week w		Score algorithm
Alarme ID	Area ID	Number of females	Number of births	Number of slaughtered animals	Number of farms	Number of farms with mortality	Total number of deaths	Number of deaths 0-20 days	Number of deaths 21 d-6 months	Number of deaths 6-24 months	Number of deaths >=24 months	d- HW+HL+SH scores > 0	h- HW+HL+SH scores stable or increasing over 4 weeks	m- excess mortality ≥20% over 4 weeks	a- HW+HL+SH scores >14	j- EW+CU scores stable or increasing over4 weeks	n- excess mortality ≥30% over 4 weeks	o- excess mortality ≥40% over 4 weeks	p- excess mortality ≥50% over 4 weeks	u- excess mortality ≥10% and increasing over 4 weeks	c- HW+HL+SH scores >14 and EW+CU scores >7	g- (HW+HL+ SH) and (EW and CU) scores > 0	i- HW+HL+SH scores increasing over 4 weeks	k- EW+CU scores increasing over 4 weeks	q- excess mortality ≥60% over 4 weeks	r- excess mortality ≥70% over 4 weeks	s- excess mortality ≥80% over 4 weeks	v- excess mortality ≥20% and increasing over 4 weeks	w- excess mortality ≥30% and increasing over 4 weeks	x- excess mortality ≥40% and increasing over 4 weeks	SH+HL+HW	CU+EW	Minimum	Maximum	Shewhart		Holt-Winters		Limites historiques		EWMA		CUSUM
																																			Score w	Score w-1/w-2/w-3	Score w	Score w-1/w-2/w-3	Score w	Score w-1/w-2/w-3	Score w	Score w-1/w-2/w-3	Score w	Score w-1/w-2/w-3
2018-W10_2606	2606	3688	2962	1064	72	14	26	14	5	1	6	no	no	no	no	no	no	no	no	no	no	no	no	no	no	no	no	no	no	no	2(2/0/0)	2(1/0/0)	4% (1)	12% (2)	1	5/0/0	0	6/0/0	3	0/0/0	5	0/0/0	7	1/0/0
2018-W10_2608	2608	4325	3645	337	74	17	28	14	4	3	7	no	yes	no	no	no	no	no	no	no	no	no	no	no	no	no	no	no	no	no	1(1/1/3)	2(1/2/2)	29% (5)	29% (5)	0	0/0/7	0	0/0/3	7	7/7/2	3	0/1/7	7	4/6/7
2018-W10_2613	2613	1077	827	3337	25	4	9	2	6	0	1	no	no	no	no	no	no	no	no	no	no	no	no	no	no	no	no	no	no	no	1(1/1/1)	0(0/2/0)	10% (1)	10% (1)	0	0/0/0	0	0/0/0	2	5/7/2	0	0/1/0	0	0/3/0
2018-W10_2618	2618	2177	2087	1541	35	4	12	10	0	0	2	no	no	no	no	no	no	no	no	no	no	no	no	no	no	no	no	no	no	no	1(2/0/1)	0(0/0/0)	9% (1)	9% (1)	0	0/0/0	0	2/0/2	2	1/0/0	0	0/0/0	0	0/0/0
2018-W10_2619	2619	4341	3626	1913	68	17	23	16	3	1	3	no	no	no	no	no	no	no	no	no	no	no	no	no	no	no	no	no	no	no	1(3/1/0)	2(2/0/0)	33% (7)	33% (7)	0	4/0/0	0	3/0/0	7	5/2/0	2	5/0/0	3	4/0/0
2018-W10_2620	2620	2890	1884	260	53	7	11	8	1	2	0	no	no	no	no	no	no	no	no	no	no	no	no	no	no	no	no	no	no	no	1(0/0/2)	0(1/1/2)	5% (1)	5% (1)	0	0/0/7	0	0/0/7	1	0/0/0	0	0/0/7	0	3/3/7
2018-W10_2623	2623	4451	3335	551	87	12	15	7	0	3	5	no	no	no	no	no	no	no	no	no	no	no	no	no	no	no	no	no	no	no	1(0/0/0)	0(0/0/0)	25% (3)	25% (3)	0	0/0/0	2	0/0/0	0	0/0/0	0	0/0/0	0	0/0/0
2018-W10_2625	2625	3411	2383	561	64	13	35	22	2	3	8	yes	no	no	yes	no	no	no	no	no	yes	yes	no	no	no	no	no	no	no	no	3(0/2/0)	2(0/1/0)	14% (3)	59% (13)	7	0/5/0	7	0/6/0	3	0/0/0	7	0/0/0	7	0/2/0
2018-W10_2627	2627	5686	4855	269	88	22	38	31	3	1	3	yes	no	no	no	no	no	no	no	no	no	no	no	no	no	no	no	no	no	no	3(0/0/0)	1(0/0/0)	9% (3)	20% (6)	3	0/0/0	5	0/0/0	5	0/0/0	2	0/0/0	0	0/0/0
2018-W10_2631	2631	3402	2402	524	63	10	20	13	3	2	2	no	no	no	no	no	no	no	no	no	no	no	no	no	no	no	no	no	no	no	1(2/0/0)	2(2/0/0)	18% (3)	18% (3)	4	7/0/0	0	3/0/0	0	0/0/0	7	3/0/0	7	4/0/0
2018-W10_2634	2634	3289	2485	1114	72	11	20	9	6	1	4	no	no	no	no	no	no	no	no	no	no	no	no	no	no	no	no	no	no	no	1(0/2/0)	0(0/1/0)	2% (1)	2% (1)	0	0/5/0	0	0/5/0	1	0/0/0	0	0/0/0	0	0/2/0
2018-W10_2638	2638	3409	2493	584	83	11	18	7	4	0	7	no	no	no	no	no	no	no	no	no	no	no	no	no	no	no	no	no	no	no	0(0/0/0)	1(0/0/0)	0% (0)	0% (0)	0	0/0/0	0	0/0/0	0	0/0/0	1	0/0/0	0	0/0/0
2018-W10_2641	2641	4641	3891	728	82	16	22	13	2	0	7	no	no	no	no	no	no	no	no	no	no	no	no	no	no	no	no	no	no	no	1(0/0/0)	0(0/0/0)	7% (2)	7% (2)	0	0/0/0	0	0/0/0	2	0/0/0	0	0/0/0	0	0/0/0
2018-W10_2642	2642	3445	2879	1639	48	11	19	14	1	1	3	no	no	no	no	no	no	no	no	no	no	no	no	no	no	no	no	no	no	no	2(1/1/0)	0(0/0/0)	1% (1)	12% (2)	0	0/0/0	1	0/0/0	1	1/1/0	0	0/0/0	0	0/0/0
2018-W10_2650	2650	2175	1806	3028	37	13	19	11	2	0	6	no	no	no	no	no	no	no	no	no	no	no	no	no	no	no	no	no	no	no	2(0/0/0)	0(0/0/0)	6% (1)	12% (2)	1	0/0/0	2	0/0/0	0	0/0/0	0	0/0/0	0	0/0/0
2018-W10_2651	2651	2391	2015	1168	37	6	10	8	0	0	2	no	no	no	no	no	no	no	no	no	no	no	no	no	no	no	no	no	no	no	1(0/0/0)	0(0/0/0)	2% (1)	2% (1)	0	0/0/0	0	0/0/0	1	0/0/0	0	0/0/0	0	0/0/0
2018-W10_2652	2652	3098	2717	1096	53	14	21	12	3	3	3	no	no	no	no	no	no	no	no	no	no	no	no	no	no	no	no	no	no	no	2(0/0/0)	1(0/0/0)	4% (1)	11% (2)	2	0/0/0	0	0/0/0	1	0/0/0	1	0/0/0	0	0/0/0
2018-W10_2653	2653	3222	2474	872	45	10	21	18	1	0	2	no	no	no	no	no	no	no	no	no	no	no	no	no	no	no	no	no	no	no	2(2/0/0)	2(1/0/0)	3% (1)	5% (1)	0	4/0/0	1	4/0/0	1	0/0/0	3	0/0/0	6	1/0/0
2018-W10_2658	2658	1866	1595	860	29	8	12	7	2	0	3	no	no	no	no	no	no	no	no	no	no	no	no	no	no	no	no	no	no	no	1(3/1/1)	0(2/0/0)	25% (3)	25% (3)	0	5/0/0	0	3/0/0	6	7/3/2	0	6/0/0	0	2/0/0
2018-W10_2664	2664	2927	2140	298	49	6	20	9	6	0	5	yes	no	no	no	no	no	no	no	no	no	yes	no	no	no	no	no	no	no	no	3(0/0/0)	2(0/0/0)	11% (2)	25% (4)	5	0/0/0	2	0/0/0	4	0/0/0	5	0/0/0	2	0/0/0
2018-W10_2665	2665	1905	1571	1192	30	8	14	9	1	0	4	no	no	no	no	no	no	no	no	no	no	no	no	no	no	no	no	no	no	no	2(1/0/0)	2(0/0/0)	17% (2)	37% (4)	0	0/0/0	2	0/0/0	7	1/0/0	5	0/0/0	4	0/0/0
2018-W10_2672	2672	3621	2851	1028	68	11	16	11	1	1	3	no	no	no	no	no	no	no	no	no	no	no	no	no	no	no	no	no	no	no	1(1/0/0)	0(0/0/0)	11% (2)	11% (2)	0	0/0/0	0	0/0/0	2	2/0/0	0	0/0/0	0	0/0/0
2018-W10_2676	2676	3808	3274	225	61	13	22	13	2	1	6	no	no	no	no	no	no	no	no	no	no	no	no	no	no	no	no	no	no	no	2(1/3/0)	2(2/2/0)	16% (3)	33% (6)	0	0/6/0	2	0/7/0	7	5/2/0	6	4/5/0	7	4/3/0
2018-W10_2682	2682	4533	3556	1107	93	14	27	17	3	1	6	no	no	no	no	no	no	no	no	no	no	no	no	no	no	no	no	no	no	no	2(1/1/0)	1(0/0/0)	3% (1)	4% (1)	1	0/0/0	0	0/0/0	1	3/2/0	1	0/0/0	0	0/0/0
2018-W10_2686	2686	4894	3888	1453	74	13	15	7	2	2	4	no	no	no	no	no	no	no	no	no	no	no	no	no	no	no	no	no	no	no	1(1/1/2)	0(2/0/2)	7% (2)	7% (2)	0	0/0/5	0	0/0/3	2	2/1/0	0	2/0/3	0	3/0/2
2018-W10_2687	2687	3514	2692	640	57	11	23	15	2	1	5	yes	no	no	no	no	no	no	no	no	no	no	no	no	no	no	no	no	no	no	3(0/0/0)	1(0/0/0)	5% (1)	10% (2)	3	0/0/0	1	0/0/0	2	0/0/0	3	0/0/0	0	0/0/0
2018-W10_2689	2689	3278	2513	625	68	12	23	10	1	0	12	no	no	no	no	no	no	no	no	no	no	no	no	no	no	no	no	no	no	no	1(1/0/2)	0(0/0/1)	11% (2)	11% (2)	0	0/0/0	0	0/0/1	3	1/0/1	0	0/0/1	0	0/0/0
2018-W10_2690	2690	3758	2893	807	66	16	23	11	3	5	4	yes	no	no	no	no	no	no	no	no	no	no	no	no	no	no	no	no	no	no	3(1/1/0)	1(0/0/0)	5% (1)	21% (3)	1	0/0/0	2	0/0/0	7	1/1/0	1	0/0/0	0	0/0/0
2018-W10_2691	2691	2279	1731	1194	44	12	15	7	3	0	5	yes	no	no	no	no	no	no	no	no	no	no	no	no	no	no	no	no	no	no	3(0/0/0)	1(0/0/0)	7% (1)	14% (2)	2	0/0/0	1	0/0/0	3	0/0/0	3	0/0/0	0	0/0/0
2018-W10_2692	2692	4731	3268	671	87	15	22	9	6	1	6	no	no	no	no	no	no	no	no	no	no	no	no	no	no	no	no	no	no	no	1(0/0/0)	0(0/0/0)	5% (1)	5% (1)	0	0/0/0	1	0/0/0	0	0/0/0	0	0/0/0	0	0/0/0
2018-W10_2695	2695	2348	1963	471	45	8	10	3	0	2	5	no	no	no	no	no	no	no	no	no	no	no	no	no	no	no	no	no	no	no	1(1/0/2)	0(0/0/1)	18% (2)	18% (2)	0	0/0/2	0	0/0/2	3	2/0/0	0	0/0/1	0	0/0/0
2018-W10_2696	2696	3240	2454	2366	53	18	27	14	4	2	7	yes	no	no	yes	no	no	no	no	no	yes	yes	no	no	no	no	no	no	no	no	3(1/2/0)	2(0/0/0)	29% (5)	42% (8)	7	0/0/0	7	0/1/0	7	1/1/0	7	0/0/0	5	0/0/0
2018-W10_4905	4905	2808	2265	1732	49	12	18	9	6	2	1	no	no	no	no	no	no	no	no	no	no	no	no	no	no	no	no	no	no	no	1(0/0/0)	1(0/0/0)	14% (2)	14% (2)	0	0/0/0	0	0/0/0	4	0/0/0	2	0/0/0	0	0/0/0

## Sheet: Farm w
Alarme ID	Area ID	Farm ID		Farm name NCR	Farm name FSDI	Farm municipality NCR	Farm municipality FSDI	Removal municipality FSDI	Farm group	SMR (last period)	Number of cattle	Number of removal of animals week w					Number of removals w+w-1+w-2+w-3	Number of removals w+w-1+w-2+w-3 previous year	Veterinary ID
		recorded in NCR	recorded in FSDI									Total	0-20 days	21 d -6 months	6-24 months	>=24 months
2018-W10-2604	2604	confidential	confidential	confidential	confidential	LAMBALLE	LAMBALLE	LAMBALLE	beef breeder	286	137	1	0	0	0	1	1	1	confidential
2018-W10-2604	2604	confidential	confidential	confidential	confidential	LAMBALLE	LAMBALLE	LAMBALLE	dairy breeder	70	347	1	1	0	0	0	4	0	confidential
2018-W10-2604	2604	confidential	confidential	confidential	confidential	LAMBALLE	LAMBALLE	LAMBALLE	dairy breeder	183	138	2	1	0	1	0	2	1	confidential
2018-W10-2604	2604	confidential	confidential	confidential	confidential	LAMBALLE	MAROUE	MAROUE	dairy breeder	69	195	1	1	0	0	0	4	2	confidential
2018-W10-2604	2604	confidential	confidential	confidential	confidential	LAMBALLE	MESLIN	MESLIN	dairy breeder fattener	138	754	1	1	0	0	0	3	3	confidential
2018-W10-2604	2604	confidential	confidential	confidential	confidential	LAMBALLE	ST AARON	ST AARON	beef breeder fattener	44	133	1	0	1	0	0	1	1	confidential
2018-W10-2604	2604	confidential	confidential	confidential	confidential	LAMBALLE	ST AARON	ST AARON	dairy breeder	59	304	1	0	0	0	1	3	0	confidential
2018-W10-2604	2604	confidential	confidential	confidential	confidential	LAMBALLE	MAROUE	MAROUE	dairy breeder	95	112	1	0	1	0	0	1	0	confidential
2018-W10-2604	2604	confidential	confidential	confidential	confidential	LAMBALLE	MAROUE	MAROUE	dairy breeder	46	323	1	1	0	0	0	3	0	confidential
2018-W10-2604	2604	confidential	confidential	confidential	confidential	LAMBALLE	ST AARON	ST AARON	dairy breeder	56	268	2	2	0	0	0	5	0	confidential
2018-W10-2606	2606	confidential	confidential	confidential	confidential	BEGARD	BEGARD	BEGARD	dairy breeder	119	248	1	0	0	0	1	3	3	confidential
2018-W10-2606	2606	confidential	confidential	confidential	confidential	COATASCORN	COATASCORN	COATASCORN	dairy breeder	63	66	1	0	0	1	0	2	1	confidential
2018-W10-2606	2606	confidential	confidential	confidential	confidential	ST LAURENT	ST LAURENT	ST LAURENT	beef breeder	0	89	1	0	0	0	1	1	0	confidential
2018-W10-2606	2606	confidential	confidential	confidential	confidential	ST LAURENT	ST LAURENT	ST LAURENT	dairy breeder	53	179	1	1	0	0	0	1	0	confidential
2018-W10-2606	2606	confidential	confidential	confidential	confidential	COATASCORN	COATASCORN	COATASCORN	beef breeder	72	345	1	1	0	0	0	3	1	confidential
2018-W10-2606	2606	confidential	confidential	confidential	confidential	ST LAURENT	ST LAURENT	ST LAURENT	beef breeder fattener	101	726	1	0	1	0	0	1	0	confidential
2018-W10-2606	2606	confidential	confidential	confidential	confidential	COATASCORN	COATASCORN	COATASCORN	dairy breeder	218	165	1	0	0	0	1	1	0	confidential
2018-W10-2606	2606	confidential	confidential	confidential	confidential	KERMOROC H	KERMOROC H	KERMOROC H	dairy breeder	92	400	2	1	1	0	0	3	2	confidential
2018-W10-2606	2606	confidential	confidential	confidential	confidential	BEGARD	BEGARD	BEGARD	mix breeder	189	250	1	1	0	0	0	1	1	confidential
2018-W10-2606	2606	confidential	confidential	confidential	confidential	BEGARD	BEGARD	BEGARD	dairy breeder	127	147	1	1	0	0	0	2	2	confidential
2018-W10-2606	2606	confidential	confidential	confidential	confidential	ST LAURENT	ST LAURENT	ST LAURENT	dairy breeder	302	294	7	6	0	0	1	17	9	confidential
2018-W10-2606	2606	confidential	confidential	confidential	confidential	BEGARD	BEGARD	BEGARD	dairy breeder	119	337	3	2	0	0	1	4	6	confidential
2018-W10-2606	2606	confidential	confidential	confidential	confidential	BEGARD	BEGARD	BEGARD	dairy breeder	115	169	4	1	3	0	0	4	1	confidential
2018-W10-2606	2606	confidential	confidential	confidential	confidential	BEGARD	BEGARD	BEGARD	dairy breeder	103	169	1	0	0	0	1	2	2	confidential
2018-W10-2608	2608	confidential	confidential	confidential	confidential	PRAT	PRAT	PRAT	dairy breeder	47	135	4	0	0	3	1	4	3	confidential
2018-W10-2608	2608	confidential	confidential	confidential	confidential	PRAT	PRAT	PRAT	dairy breeder fattener	73	189	1	0	1	0	0	3	0	confidential
2018-W10-2608	2608	confidential	confidential	confidential	confidential	LANGOAT	LANGOAT	LANGOAT	dairy breeder	200	158	1	0	0	0	1	4	0	confidential
2018-W10-2608	2608	confidential	confidential	confidential	confidential	PRAT	PRAT	PRAT	dairy breeder	151	396	1	0	0	0	1	2	1	confidential
2018-W10-2608	2608	confidential	confidential	confidential	confidential	BERHET	BERHET	BERHET	dairy breeder	89	189	1	0	0	0	1	1	2	confidential
2018-W10-2608	2608	confidential	confidential	confidential	confidential	CAVAN	CAVAN	CAVAN	dairy breeder fattener	107	233	2	0	1	0	1	3	2	confidential
2018-W10-2608	2608	confidential	confidential	confidential	confidential	PRAT	PRAT	PRAT	dairy breeder	105	138	1	0	0	0	1	1	1	confidential
2018-W10-2608	2608	confidential	confidential	confidential	confidential	BERHET	BERHET	BERHET	dairy breeder	80	184	1	1	0	0	0	4	0	confidential
2018-W10-2608	2608	confidential	confidential	confidential	confidential	BERHET	BERHET	BERHET	dairy breeder	103	178	3	3	0	0	0	4	0	confidential
2018-W10-2608	2608	confidential	confidential	confidential	confidential	PRAT	PRAT	PRAT	dairy breeder	108	226	1	1	0	0	0	2	1	confidential
2018-W10-2608	2608	confidential	confidential	confidential	confidential	PRAT	PRAT	PRAT	dairy breeder	63	357	4	4	0	0	0	4	2	confidential
2018-W10-2608	2608	confidential	confidential	confidential	confidential	BERHET	BERHET	BERHET	dairy breeder fattener	63	201	2	1	1	0	0	7	0	confidential
2018-W10-2608	2608	confidential	confidential	confidential	confidential	CAVAN	CAVAN	CAVAN	dairy breeder	57	213	1	0	1	0	0	2	0	confidential
2018-W10-2608	2608	confidential	confidential	confidential	confidential	COATREVEN	COATREVEN	COATREVEN	dairy breeder	109	172	1	1	0	0	0	3	3	confidential
2018-W10-2608	2608	confidential	confidential	confidential	confidential	CAVAN	CAVAN	CAVAN	dairy breeder	106	273	1	1	0	0	0	4	2	confidential
2018-W10-2608	2608	confidential	confidential	confidential	confidential	CAVAN	CAVAN	CAVAN	beef breeder	79	98	1	1	0	0	0	4	1	confidential
2018-W10-2608	2608	confidential	confidential	confidential	confidential	CAVAN	CAVAN	CAVAN	dairy breeder fattener	91	174	2	1	0	0	1	2	1	confidential

## Sheet: Alarm -1 to -3
ID			Demographic information				Week w mortality information						Number of algorithms with score >0 week w and three previous weeks (w-1,w-2,w-3)		Excess ratio (number of excess deaths) week w		Score algorithm
Week	Alarme ID	Area ID	Number of females	Number of births	Number of slaughtered animals	Number of farms	Number of farms with mortality	Total number of deaths	Number of deaths 0-20 days	Number of deaths 21 d-6 months	Number of deaths 6-24 months	Number of deaths >=24 months	SH+HL+HW	CU+EW	Minimum	Maximum	Shewhart	Holt-Winters	Limites historiques	EWMA	CUSUM
																	Score w	Score w	Score w	Score w	Score w
2018-W09	2018-W09_2604	2604	2971	2506	2162	62	13	21	13	0	1	7	2	0	5% (1)	11% (2)	1	1	0	0	0
2018-W09	2018-W09_2606	2606	3688	2962	1064	72	15	27	15	4	3	5	2	1	17% (4)	29% (6)	5	6	0	0	1
2018-W09	2018-W09_2608	2608	4325	3645	337	74	14	17	14	2	0	1	1	1	25% (5)	25% (5)	0	0	7	0	4
2018-W09	2018-W09_2612	2612	3110	2397	1958	62	12	20	9	6	2	3	1	0	25% (4)	25% (4)	0	4	0	0	0
2018-W09	2018-W09_2613	2613	1077	827	3337	25	4	4	3	0	0	1	1	0	23% (2)	23% (2)	0	0	5	0	0
2018-W09	2018-W09_2618	2618	2177	2087	1541	35	10	15	11	2	1	1	2	0	6% (1)	15% (2)	0	2	1	0	0
2018-W09	2018-W09_2619	2619	4341	3626	1913	68	18	32	22	3	2	5	3	2	14% (4)	19% (4)	4	3	5	5	4
2018-W09	2018-W09_2620	2620	2890	1884	260	53	10	15	4	3	1	7	0	1	0% (0)	0% (0)	0	0	0	0	3
2018-W09	2018-W09_2628	2628	4254	3357	325	79	13	23	12	2	3	6	1	0	1% (1)	1% (1)	0	0	1	0	0
2018-W09	2018-W09_2631	2631	3402	2402	524	63	12	23	12	2	2	7	2	2	15% (3)	35% (6)	7	3	0	3	4
2018-W09	2018-W09_2642	2642	3445	2879	1639	48	11	16	13	1	0	2	1	0	3% (1)	3% (1)	0	0	1	0	0
2018-W09	2018-W09_2649	2649	3898	2722	600	55	17	30	14	8	3	5	2	2	20% (5)	36% (8)	7	5	0	3	7
2018-W09	2018-W09_2653	2653	3222	2474	872	45	14	25	12	6	1	6	2	1	14% (3)	19% (4)	4	4	0	0	1
2018-W09	2018-W09_2658	2658	1866	1595	860	29	7	20	13	5	1	1	3	2	18% (3)	27% (3)	5	3	7	6	2
2018-W09	2018-W09_2659	2659	4162	3486	1054	81	17	22	13	5	1	3	1	0	6% (1)	6% (1)	0	0	2	0	0
2018-W09	2018-W09_2665	2665	1905	1571	1192	30	7	12	5	3	2	2	1	0	6% (1)	6% (1)	0	0	1	0	0
2018-W09	2018-W09_2672	2672	3621	2851	1028	68	14	18	4	3	2	9	1	0	9% (2)	9% (2)	0	0	2	0	0
2018-W09	2018-W09_2676	2676	3808	3274	225	61	13	19	11	1	0	7	1	2	18% (3)	18% (3)	0	0	5	4	4
2018-W09	2018-W09_2677	2677	2710	2179	2109	56	12	16	13	0	1	2	1	0	4% (1)	4% (1)	0	0	1	0	0
2018-W09	2018-W09_2682	2682	4533	3556	1107	93	12	20	12	3	1	4	1	0	11% (2)	11% (2)	0	0	3	0	0
2018-W09	2018-W09_2686	2686	4894	3888	1453	74	14	27	18	2	0	7	1	2	9% (3)	9% (3)	0	0	2	2	3
2018-W09	2018-W09_2689	2689	3278	2513	625	68	16	21	8	7	2	4	1	0	1% (1)	1% (1)	0	0	1	0	0
2018-W09	2018-W09_2690	2690	3758	2893	807	66	11	12	5	0	2	5	1	0	4% (1)	4% (1)	0	0	1	0	0
2018-W09	2018-W09_2695	2695	2348	1963	471	45	8	9	6	1	0	2	1	0	9% (1)	9% (1)	0	0	2	0	0
2018-W09	2018-W09_2696	2696	3240	2454	2366	53	8	13	6	3	2	2	1	0	4% (1)	4% (1)	0	0	1	0	0
2018-W08	2018-W08_2608	2608	4325	3645	337	74	12	15	10	1	1	3	1	2	24% (5)	24% (5)	0	0	7	1	6
2018-W08	2018-W08_2610	2610	3755	2948	1671	76	14	18	12	2	1	3	1	0	6% (1)	6% (1)	0	0	2	0	0
2018-W08	2018-W08_2611	2611	3576	2715	1685	67	9	14	9	0	1	4	1	0	2% (1)	2% (1)	0	0	1	0	0
2018-W08	2018-W08_2613	2613	1077	827	3337	25	10	11	1	9	0	1	1	2	38% (3)	38% (3)	0	0	7	1	3
2018-W08	2018-W08_2615	2615	2693	2245	1435	51	15	26	12	12	1	1	1	0	3% (1)	3% (1)	0	0	1	0	0
2018-W08	2018-W08_2619	2619	4341	3626	1913	68	18	20	9	3	1	7	1	0	8% (2)	8% (2)	0	0	2	0	0
2018-W08	2018-W08_2620	2620	2890	1884	260	53	7	8	5	0	1	2	0	1	0% (0)	0% (0)	0	0	0	0	3
2018-W08	2018-W08_2625	2625	3411	2383	561	64	11	28	12	3	2	11	2	1	17% (4)	27% (6)	5	6	0	0	2
2018-W08	2018-W08_2634	2634	3289	2485	1114	72	14	25	9	7	3	6	2	1	19% (4)	25% (5)	5	5	0	0	2
2018-W08	2018-W08_2635	2635	3726	3121	2683	76	17	29	17	5	2	5	2	0	16% (4)	32% (7)	4	6	0	0	0
2018-W08	2018-W08_2642	2642	3445	2879	1639	48	11	16	13	0	0	3	1	0	5% (1)	5% (1)	0	0	1	0	0
2018-W08	2018-W08_2658	2658	1866	1595	860	29	6	10	4	3	0	3	1	0	14% (2)	14% (2)	0	0	3	0	0
2018-W08	2018-W08_2659	2659	4162	3486	1054	81	14	21	9	4	1	7	1	0	9% (2)	9% (2)	0	0	2	0	0
2018-W08	2018-W08_2661	2661	3956	3336	1374	68	15	23	15	3	1	4	1	0	5% (1)	5% (1)	0	1	0	0	0
2018-W08	2018-W08_2676	2676	3808	3274	225	61	19	28	19	4	0	5	3	2	9% (2)	33% (7)	6	7	2	5	3
2018-W08	2018-W08_2682	2682	4533	3556	1107	93	11	14	8	1	2	3	1	0	9% (2)	9% (2)	0	0	2	0	0
2018-W08	2018-W08_2686	2686	4894	3888	1453	74	15	23	13	1	2	7	1	0	2% (1)	2% (1)	0	0	1	0	0
2018-W08	2018-W08_2690	2690	3758	2893	807	66	11	17	8	3	2	4	1	0	2% (1)	2% (1)	0	0	1	0	0
2018-W08	2018-W08_2696	2696	3240	2454	2366	53	10	17	9	5	1	2	2	0	4% (1)	6% (1)	0	1	1	0	0
2018-W07	2018-W07_2608	2608	4325	3645	337	74	20	33	21	2	1	9	3	2	8% (2)	% (8)	7	3	2	7	7
2018-W07	2018-W07_2611	2611	3576	2715	1685	67	10	15	12	1	1	1	1	0	3% (1)	% (1)	0	0	1	0	0
2018-W07	2018-W07_2613	2613	1077	827	3337	25	6	9	2	2	3	2	1	0	12% (1)	% (1)	0	0	2	0	0
2018-W07	2018-W07_2614	2614	4572	3481	545	73	16	30	16	4	2	8	1	0	3% (1)	% (1)	0	1	0	0	0
2018-W07	2018-W07_2618	2618	2177	2087	1541	35	11	17	10	2	1	4	1	0	13% (2)	% (2)	0	2	0	0	0
2018-W07	2018-W07_2620	2620	2890	1884	260	53	10	30	23	1	3	3	2	2	58% (11)	% (13)	7	7	0	7	7
2018-W07	2018-W07_2648	2648	3950	2794	342	77	11	26	16	1	1	8	1	0	4% (1)	% (1)	1	0	0	0	0
2018-W07	2018-W07_2658	2658	1866	1595	860	29	9	15	13	1	0	1	1	0	9% (1)	% (1)	0	0	2	0	0
2018-W07	2018-W07_2686	2686	4894	3888	1453	74	19	37	24	4	1	8	2	2	16% (5)	% (6)	5	3	0	3	2
2018-W07	2018-W07_2689	2689	3278	2513	625	68	16	25	8	3	3	11	2	1	5% (1)	% (2)	0	1	1	1	0
2018-W07	2018-W07_2695	2695	2348	1963	471	45	8	14	7	4	0	3	2	1	8% (1)	% (2)	2	2	0	1	0

## Sheet: Farms -1 to -3
Alarme ID	Week ID	Area ID	Farm ID		Farm name NCR	Farm name FSDI	Farm municipality NCR	Farm municipality FSDI	Removal municipality FSDI	Farm group	SMR (last period)	Number of cattle	Number of removal of animals week w					Veterinary ID
			recorded in NCR	recorded in FSDI									Total	0-20 days	21 d -6 months	6-24 months	>=24 months
2018-W07-2604	2018-W07	2604	confidential	confidential	confidential	confidential	LAMBALLE	MAROUE	MAROUE	dairy breeder	95	211	1	1	0	0	0	confidential
2018-W07-2604	2018-W07	2604	confidential	confidential	confidential	confidential	LAMBALLE	MESLIN	MESLIN	dairy breeder fattener	138	754	1	0	0	0	1	confidential
2018-W09-2604	2018-W09	2604	confidential	confidential	confidential	confidential	LAMBALLE	MAROUE	MAROUE	dairy breeder	49	213	1	1	0	0	0	confidential
2018-W08-2604	2018-W08	2604	confidential	confidential	confidential	confidential	LAMBALLE	MESLIN	MESLIN	dairy breeder fattener	138	754	1	0	1	0	0	confidential
2018-W07-2604	2018-W07	2604	confidential	confidential	confidential	confidential	LAMBALLE	MAROUE	MAROUE	dairy breeder	460	71	1	1	0	0	0	confidential
2018-W09-2604	2018-W09	2604	confidential	confidential	confidential	confidential	LAMBALLE	MAROUE	MAROUE	dairy breeder	99	357	2	1	0	0	1	confidential
2018-W07-2604	2018-W07	2604	confidential	confidential	confidential	confidential		TREGOMAR	TREGOMAR				1	0	1	0	0	confidential
2018-W09-2604	2018-W09	2604	confidential	confidential	confidential	confidential	LAMBALLE	MAROUE	MAROUE	dairy breeder	86	173	1	1	0	0	0	confidential
2018-W09-2604	2018-W09	2604	confidential	confidential	confidential	confidential	LAMBALLE	MAROUE	MAROUE	fattener	92	31	1	0	0	1	0	confidential
2018-W09-2604	2018-W09	2604	confidential	confidential	confidential	confidential	LAMBALLE	MAROUE	MAROUE	dairy breeder	46	323	1	0	0	0	1	confidential
2018-W08-2604	2018-W08	2604	confidential	confidential	confidential	confidential	LAMBALLE	MAROUE	MAROUE	fattener	92	31	1	0	0	1	0	confidential
2018-W09-2604	2018-W09	2604	confidential	confidential	confidential	confidential	LAMBALLE	ST AARON	ST AARON	dairy breeder	56	268	3	2	0	0	1	confidential
2018-W09-2604	2018-W09	2604	confidential	confidential	confidential	confidential	LAMBALLE	MESLIN	MESLIN	dairy breeder	23	205	1	1	0	0	0	confidential
2018-W09-2604	2018-W09	2604	confidential	confidential	confidential	confidential	QUINTENIC	QUINTENIC	QUINTENIC	dairy breeder	75	197	1	1	0	0	0	confidential
2018-W08-2604	2018-W08	2604	confidential	confidential	confidential	confidential	LAMBALLE	MAROUE	MAROUE	dairy breeder	46	323	1	1	0	0	0	confidential
2018-W09-2604	2018-W09	2604	confidential	confidential	confidential	confidential	LAMBALLE	ST AARON	ST AARON	dairy breeder	65	100	1	0	0	0	1	confidential
2018-W09-2604	2018-W09	2604	confidential	confidential	confidential	confidential	LAMBALLE	ST AARON	ST AARON	dairy breeder	109	362	3	3	0	0	0	confidential
2018-W08-2604	2018-W08	2604	confidential	confidential	confidential	confidential	LAMBALLE	MAROUE	MAROUE	dairy breeder	69	195	1	0	1	0	0	confidential
2018-W09-2604	2018-W09	2604	confidential	confidential	confidential	confidential	LAMBALLE	MAROUE	MAROUE	beef breeder	218	211	2	1	0	0	1	confidential
2018-W09-2604	2018-W09	2604	confidential	confidential	confidential	confidential	LAMBALLE	MAROUE	MAROUE	dairy breeder	69	195	2	1	0	0	1	confidential
2018-W07-2604	2018-W07	2604	confidential	confidential	confidential	confidential	LAMBALLE	LAMBALLE	LAMBALLE	dairy breeder	70	347	3	2	0	0	1	confidential
2018-W08-2604	2018-W08	2604	confidential	confidential	confidential	confidential	LAMBALLE	MESLIN	MESLIN	fattener	87	1278	1	0	1	0	0	confidential
2018-W09-2604	2018-W09	2604	confidential	confidential	confidential	confidential	LAMBALLE	MAROUE	MAROUE	dairy breeder	424	98	2	1	0	0	1	confidential
2018-W07-2604	2018-W07	2604	confidential	confidential	confidential	confidential	LAMBALLE	ST AARON	ST AARON	dairy breeder	59	304	2	0	1	0	1	confidential
2018-W08-2604	2018-W08	2604	confidential	confidential	confidential	confidential	LAMBALLE	MESLIN	MESLIN	dairy breeder	89	127	1	1	0	0	0	confidential
2018-W07-2606	2018-W07	2606	confidential	confidential	confidential	confidential	KERMOROC H	KERMOROC H	KERMOROC H	dairy breeder	47	151	1	1	0	0	0	confidential
2018-W09-2606	2018-W09	2606	confidential	confidential	confidential	confidential	COATASCORN	COATASCORN	COATASCORN	dairy breeder	88	237	3	0	2	0	1	confidential
2018-W08-2606	2018-W08	2606	confidential	confidential	confidential	confidential	BEGARD	BEGARD	BEGARD	dairy breeder	56	208	1	0	0	0	1	confidential
2018-W08-2606	2018-W08	2606	confidential	confidential	confidential	confidential	COATASCORN	COATASCORN	COATASCORN	dairy breeder	63	66	1	1	0	0	0	confidential
2018-W09-2606	2018-W09	2606	confidential	confidential	confidential	confidential	KERMOROC H	KERMOROC H	KERMOROC H	dairy breeder fattener	60	259	1	1	0	0	0	confidential
2018-W08-2606	2018-W08	2606	confidential	confidential	confidential	confidential	COATASCORN	COATASCORN	COATASCORN	beef breeder	72	345	1	0	1	0	0	confidential
2018-W08-2606	2018-W08	2606	confidential	confidential	confidential	confidential	BEGARD	BEGARD	BEGARD	mix breeder	47	199	1	0	0	0	1	confidential
2018-W09-2606	2018-W09	2606	confidential	confidential	confidential	confidential	COATASCORN	COATASCORN	COATASCORN	dairy breeder	118	57	1	1	0	0	0	confidential
2018-W07-2606	2018-W07	2606	confidential	confidential	confidential	confidential	BEGARD	BEGARD	BEGARD	dairy breeder	119	248	1	1	0	0	0	confidential

## Sheet: Area info
Area ID	Demographic information (previous year data)				Does the area overlap with other départements?	Number of municipalities	Names of the municipalities included
	Number of farms	Number of females	Number of births	Number of slaughtered animals
2603	37	1618	1157	2779	NO	1	ALLINEUC
2604	62	2971	2506	2162	NO	3	ANDEL,LAMBALLE,QUINTENIC
2605	74	3988	3099	865	NO	7	AUCALEUC,CORSEUL,PLANCOET,PLUDUNO,SAINT-LORMEL,SAINT-CAST-LE-GUILDO,TRELIVAN
2606	72	3688	2962	1064	NO	5	BEGARD,SAINT-LAURENT,BRELIDY,COATASCORN,KERMOROC'H
2607	53	3181	2251	287	NO	2	BELLE-ISLE-EN-TERRE,LOUARGAT
2608	74	4325	3645	337	NO	8	BERHET,PRAT,CAVAN,LANGOAT,COATREVEN,MANTALLOT,LA ROCHE-DERRIEN,RUNAN
2609	78	3582	3091	2244	NO	7	BINIC,PORDIC,BRINGOLO,PLELO,LANTIC,SAINT-JEAN-KERDANIEL,TREGOMEUR
2610	76	3755	2948	1671	NO	8	BOBITAL,SAINT-CARNE,CALORGUEN,LES CHAMPS-GERAUX,LEHON,QUEVERT,EVRAN,TREVRON
2611	67	3576	2715	1685	NO	4	LE BODEO,LA HARMOYE,SAINT-BIHY,LE VIEUX-BOURG
2612	62	3110	2397	1958	NO	4	BOQUEHO,SAINT-GILDAS,LE LESLAY,SENVEN-LEHART
2613	25	1077	827	3337	NO	2	LA BOUILLIE,SAINT-ALBAN
2614	73	4572	3481	545	NO	4	BOURBRIAC,COADOUT,PLESIDY,SAINT-ADRIEN
2615	51	2693	2245	1435	NO	3	BOURSEUL,JUGON-LES-LACS - COMMUNE NOUVELLE,PLOREC-SUR-ARGUENON
2616	61	3559	3091	807	NO	3	BREHAND,HENON,LANDEHEN
2617	3	20	2	2	NO	1	ILE-DE-BREHAT
2618	35	2177	2087	1541	NO	2	BROONS,TREDIAS
2619	68	4341	3626	1913	NO	5	BRUSVILY,YVIGNAC-LA-TOUR,CAULNES,GUENROC,PLUMAUDAN
2620	53	2890	1884	260	NO	2	BULAT-PESTIVIEN,PLOUGONVER
2621	43	2758	1920	622	NO	2	CALANHEL,PLUSQUELLEC
2622	59	2894	2065	558	NO	3	CALLAC,LA CHAPELLE-NEUVE,SAINT-SERVAIS
2623	87	4451	3335	551	NO	5	CANIHUEL,LE HAUT-CORLAY,KERPERT,SAINT-CONNAN,SAINT-GILLES-PLIGEAUX
2624	112	5165	4112	601	NO	14	CAOUENNEC-LANVEZEAC,LANNION,PLEUMEUR-BODOU,ROSPEZ,LANMERIN,QUEMPERVEN,SAINT-QUAY-PERROS,TREBEURDEN,TREZENY,CAMLEZ,KERMARIA-SULARD,LOUANNEC,PERROS-GUIREC,TRELEVERN
2625	64	3411	2383	561	YES	4	CARNOET,PLOUNEVEZEL,TREFFRIN,TREBRIVAN
2626	0	0	0	0	NO	1	CHATELAUDREN
2627	88	5686	4855	269	YES	4	LA CHEZE,BREHAN,ROHAN,SAINT-ETIENNE-DU-GUE-DE-L'ISLE
2628	79	4254	3357	325	NO	6	COHINIAC,LE FOEIL,LA MEAUGON,SAINT-DONAN,PLERNEUF,PLOUVARA
2629	160	8551	6813	5349	NO	2	LE MENE,SAINT-GLEN
2630	0	0	0	0	NO	1	DINAN
2631	63	3402	2402	524	NO	4	DUAULT,LOCARN,SAINT-NICODEME,PEUMERIT-QUINTIN
2632	52	2837	2379	2142	NO	4	EREAC,MERILLAC,ROUILLAC,SAINT-VRAN
2633	60	2980	2585	286	NO	9	ETABLES-SUR-MER,PLOURHAN,LANLOUP,PLOUHA,TREVENEUC,PLEGUIEN,PLUDUAL,TREGUIDEL,TRESSIGNAUX
2634	72	3289	2485	1114	NO	9	LE FAOUET,QUEMPER-GUEZENNEC,PLOEZAL,PLOUEC-DU-TRIEUX,TREMEVEN,TREVEREC,LANDEBAERON,SAINT-CLET,SAINT-GILLES-LES-BOIS
2635	76	3726	3121	2683	NO	4	GAUSSON,LA MOTTE,GRACE-UZEL,LA PRENESSAYE
2636	89	4838	3704	554	YES	4	GLOMEL,PLOURAY,PRIZIAC,MESLAN
2637	77	4383	3775	564	NO	8	GOMMENEC'H,POMMERIT-LE-VICOMTE,GOUDELIN,LANNEBERT,LANVOLLON,LE MERZER,SAINT-AGATHON,SQUIFFIEC
2638	83	3409	2493	584	NO	4	GOUAREC,PLOUGUERNEVEL,MELLIONNEC,ROSTRENEN
2639	40	2722	2080	1620	NO	3	GRACES,MOUSTERU,GURUNHUEL
2640	0	0	0	0	NO	1	GUINGAMP
2641	82	4641	3891	728	NO	4	HEMONSTOIR,LOUDEAC,SAINT-MAUDAN,SAINT-BARNABE
2642	48	3445	2879	1639	NO	4	HENANBIHEN,SAINT-POTAN,HENANSAL,MATIGNON
2643	81	2890	2445	1789	NO	14	HENGOAT,PLEUMEUR-GAUTIER,TREDARZEC,MINIHY-TREGUIER,PLOUGUIEL,POMMERIT-JAUDY,TROGUERY,KERBORS,LEZARDRIEUX,PLEUBIAN,POULDOURAN,PENVENAN,TREVOU-TREGUIGNEC,PLOUGRESCANT
2644	34	2379	2067	595	NO	4	HILLION,POMMERET,YFFINIAC,TREGUEUX
2645	0	0	0	0	NO	1	LE HINGLE
2646	35	2397	1995	1645	YES	2	ILLIFAUT,SAINT-BRIEUC-DE-MAURON
2647	86	3029	2206	1662	NO	7	KERFOT,YVIAS,PAIMPOL,PLOUEZEC,PLEHEDEL,PLOURIVO,PLEUDANIEL
2648	77	3950	2794	342	NO	3	KERGRIST-MOELOU,MAEL-CARHAIX,LE MOUSTOIR
2649	55	3898	2722	600	NO	3	KERIEN,LANRIVAIN,MAGOAR
2650	37	2175	1806	3028	NO	7	LA LANDEC,PLELAN-LE-PETIT,SAINT-MAUDEZ,SAINT-MELOIR-DES-BOIS,SAINT-MICHEL-DE-PLELAN,TREBEDAN,VILDE-GUINGALAN
2651	37	2391	2015	1168	NO	3	LANFAINS,SAINT-BRANDAN,QUINTIN
2652	53	3098	2717	1096	NO	2	LANGAST,PLOUGUENAST
2653	45	3222	2474	872	NO	7	LANGROLAY-SUR-RANCE,PLOUER-SUR-RANCE,PLESLIN-TRIGAVOU,SAINT-SAMSON-SUR-RANCE,TADEN,LANVALLAY,LA VICOMTE-SUR-RANCE
2654	0	0	0	0	NO	1	LANGUEUX
2655	62	3306	2377	1015	NO	5	LANISCAT,PLUSSULIEN,SAINT-GELVEN,CORLAY,SAINT-IGEAUX
2656	0	0	0	0	NO	1	LANLEFF
2657	0	0	0	0	NO	1	LANMODEZ
2658	29	1866	1595	860	NO	2	LANRELAS,SAINT-LAUNEUC
2659	81	4162	3486	1054	NO	5	LANRODEC,PLOUAGAT,SAINT-FIACRE,PLOUMAGOAR,SAINT-PEVER

## Sheet: Municipality info
Municipality name	INSEE ID at 01/01/2016	ID area
Allineuc	22001	2603
Andel	22002	2604
Saint-Aaron	22093	2604
Lamballe	22093	2604
Maroué	22093	2604
Quintenic	22261	2604
Meslin	22093	2604
Trégomar	22093	2604
Poterie	22093	2604
Saint-Cast-le-Guildo	22282	2605
Trélivan	22364	2605
Corseul	22048	2605
Aucaleuc	22003	2605
Plancoët	22172	2605
Notre-Dame-du-Guildo	22282	2605
Pluduno	22237	2605
Saint-Lormel	22311	2605
Coatascorn	22041	2606
Kermoroc'h	22091	2606
Brélidy	22018	2606
Bégard	22004	2606
Saint-Laurent	22310	2606
Louargat	22135	2607
Belle-Isle-en-Terre	22005	2607
Berhet	22006	2608
Coatréven	22042	2608
Prat	22254	2608
Langoat	22101	2608
Mantallot	22141	2608
Roche-Derrien	22264	2608
Cavan	22034	2608
Runan	22269	2608
Trégomeur	22356	2609
Binic	22007	2609
Tréméloir	22251	2609
Plélo	22182	2609
Pordic	22251	2609
Lantic	22117	2609
Bringolo	22019	2609
